# Supplementary material for: Synthesis of Ag2CO3/Bi2WO6 heterojunctions with enhanced photocatalytic activity and cycling stability
Source: Royal Society of Chemistry journal article supplement (doi:10.1039/c5ra18938a), 2015-01-01
Supplement: c5ra18938a1.pdf [file c5ra18938a1.pdf]

***Supporting Information for***

**Synthesis of  $\text{Ag}_2\text{CO}_3/\text{Bi}_2\text{WO}_6$  heterojunctions with enhanced  
photocatalytic activity and cycling stability**

Jianxing Bao<sup>a,b,c</sup>, Shenghui Guo<sup>a,b,c</sup>, Jiyun Gao<sup>d</sup>, Tu Hu<sup>a,b,c</sup>, Li Yang<sup>a,b,c\*</sup>, Chenhui Liu<sup>d</sup>, Jinhui Peng<sup>a,b,c,d</sup> and Caiyi Jiang<sup>a,b,c</sup>

*a. State Key Laboratory of Complex Nonferrous Metal Resources Clean Utilization, Kunming University of Science and Technology, Kunming 650093, China*

*b. National Local Joint Laboratory of Engineering Application of Microwave Energy and Equipment Technology, Kunming 650093, China*

*c. Faculty of Metallurgical and Energy Engineering, Kunming University of Science and Technology, Kunming 650093, China*

*d. Key Laboratory of Comprehensive Utilization of Mineral Resources in National Regions, Yunnan Minzu University, Kunming 650031, China*

E-mail: yanglikmust@163.com

Fax: +86-871-65138997

### Electronegativity calculation for the electronic band structures of $\text{Ag}_2\text{CO}_3$ and $\text{Bi}_2\text{WO}_6$ .

The relative position of conduction band (CB) of  $\text{Ag}_2\text{CO}_3$  and  $\text{Bi}_2\text{WO}_6$  were estimated by the empirical formula in eqn (1).<sup>1</sup>

$$E_{\text{CB}} = X - E_0 - 0.5 E_g \quad (1)$$

where  $E_{\text{CB}}$  is the CB edge potential,  $E_0$  is the energy of free electrons of the hydrogenscale (4.5 eV),  $E_g$  is the band gap energy of the semiconductor obtained from the UV-visible diffuse reflectance absorption,  $X$  is the electronegativity of the semiconductor, which can be expressed as the geometric mean of the absolute electronegativity of the constituent atoms. The  $X$  values for  $\text{Bi}_2\text{WO}_6$  and  $\text{Ag}_2\text{CO}_3$  are calculated to be 6.36 and 6.02 eV,<sup>2,3</sup> and the band gap energies of  $\text{Ag}_2\text{CO}_3$  and  $\text{Bi}_2\text{WO}_6$  are 2.17 and 2.74 eV, respectively. Therefore, the  $E_{\text{CB}}$  for  $\text{Ag}_2\text{CO}_3$  and  $\text{Bi}_2\text{WO}_6$  were calculated to be 0.49 and 0.43 eV respectively. The relative position of conduction band (VB) of  $\text{Ag}_2\text{CO}_3$  and  $\text{Bi}_2\text{WO}_6$  can be deduced from eqn (2)

$$E_{\text{VB}} = E_{\text{CB}} + E_g \quad (2)$$

The  $E_{\text{VB}}$  for  $\text{Ag}_2\text{CO}_3$  and  $\text{Bi}_2\text{WO}_6$  were calculated to be 3.23 and 2.61 eV respectively. The details of the energy band of  $\text{Ag}_2\text{CO}_3$  and  $\text{Bi}_2\text{WO}_6$  are shown in Fig. S1.

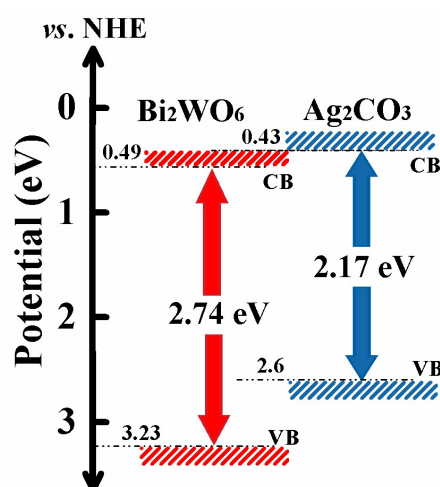

**Fig. S1** Schematic diagram for energy band of  $\text{Ag}_2\text{CO}_3$  and  $\text{Bi}_2\text{WO}_6$ .

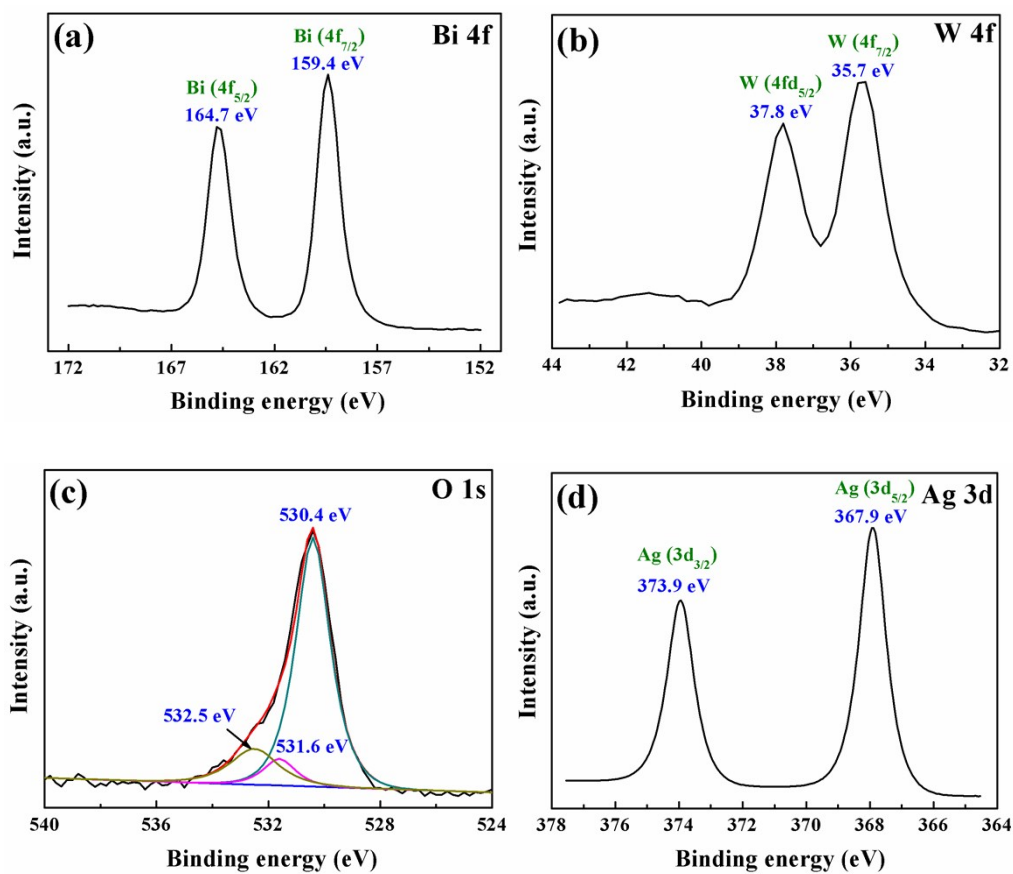

**Fig. S2** XPS spectra of Bi 4f (a), W 4f (b) O 1s (c) for pure Bi<sub>2</sub>WO<sub>6</sub> and Ag 3d (d) for pure Ag<sub>2</sub>CO<sub>3</sub>.

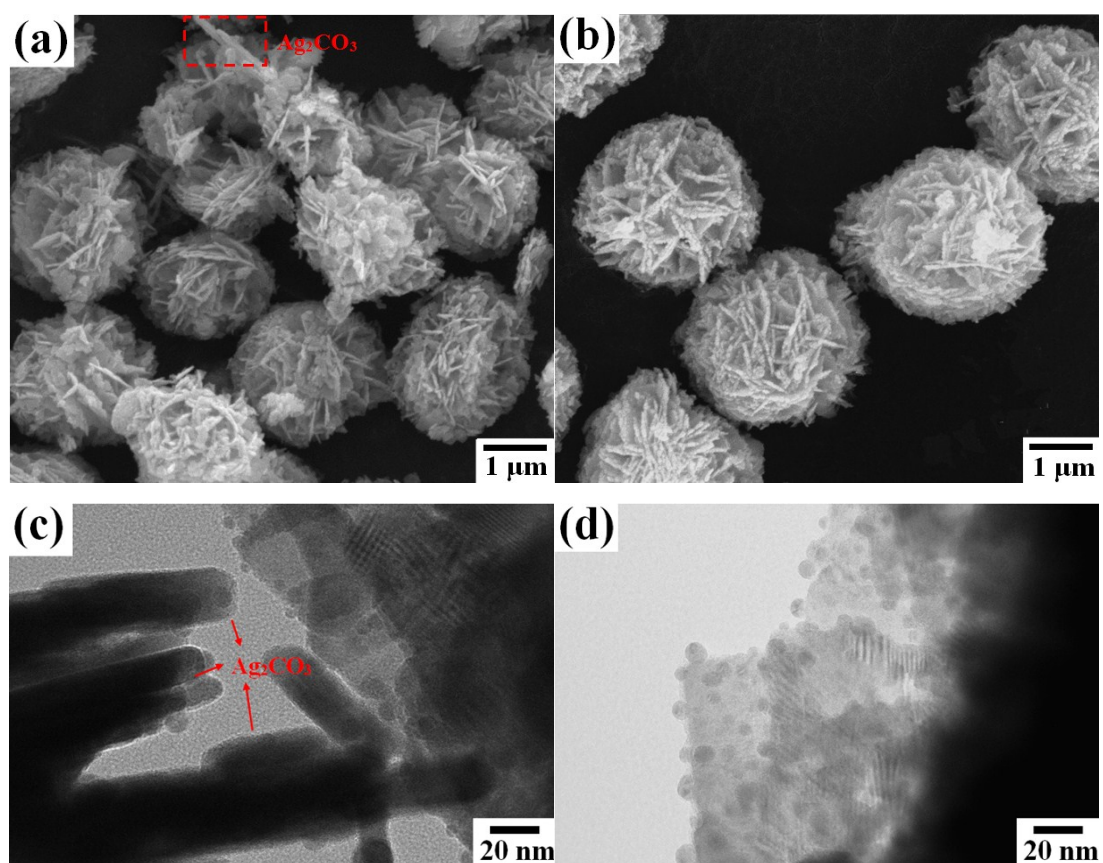

**Fig. S3** SEM and TEM images of the  $\text{Ag}_2\text{CO}_3/\text{Bi}_2\text{WO}_6$  (30 wt%) composite prepared in the absence (a and c) and presence (b and d) of  $\text{NH}_3\cdot\text{H}_2\text{O}$ .

The pseudo-first-order kinetics model was used to fit the experimental data as expressed by eqn (3)<sup>4</sup>

$$\ln(C_0/C) = kt \quad (3)$$

where  $k$  is the reaction rate constant,  $t$  is the time,  $C$  and  $C_0$  are the reactant concentrations at time  $t = t$  and 0, respectively. On the basis of the experimental data in Fig. 8 (a) and (c), the pseudo-first-order reaction kinetic for the degradation of RhB and MO solution was displays in Fig S4 (a) and (b).

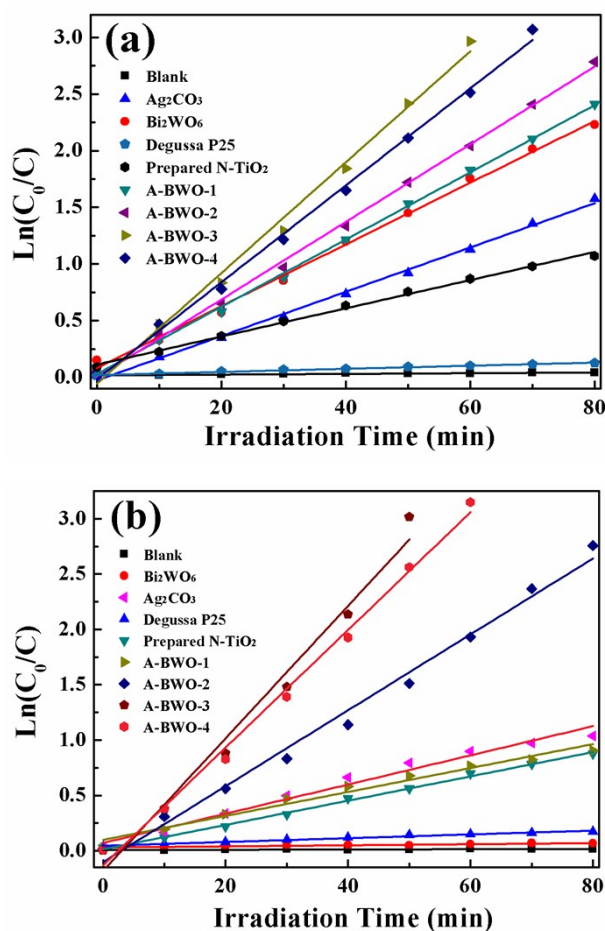

**Fig. S4** The pseudo-first-order rate constants of as-samples for the degradation of RhB (a) and MO (b) under visible light.

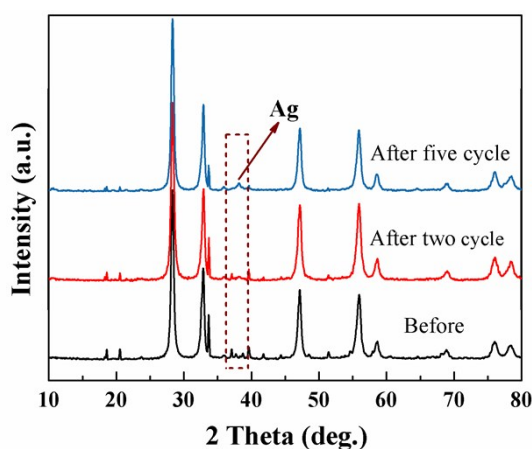

**Fig. S5** XRD patterns of A-BWO-3 before and after photo-degradation of RhB.

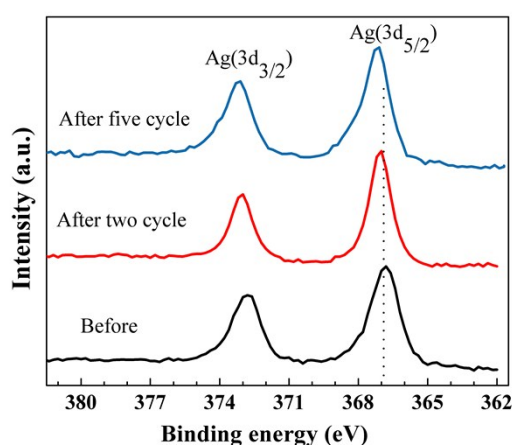

**Fig. S6** XPS spectra of Ag peaks in A-BWO-3 before and after photo-degradation of RhB.

## References

- [1] X. Zhang, L. Z. Zhang, T. F. Xie and D. J. Wang, *J. Phys. Chem. C*, 2009, 113, 7371-7378.
- [2] Z. J. Zhang, W. Z. Wang, L. Wang and S. M. Sun, *Acs Appl. Mater. Interfaces*, 2012, 4, 593-597.
- [3] G. P. Dai, J. G. Yu and G. Liu, *J. Phys. Chem. C*, 2012, 116, 15519-15524
- [4] X. Xiao, R. P. Hu, C. Liu, C. L. Xing, C. Qian, X. X. Zuo, J. M. Nan and L. S. Wang, *Appl. Catal., B*, 2013, 140-141, 433-443.
